# Supplementary material for: Active and stable PtP2-based electrocatalysts solve the phosphate poisoning issue of high temperature fuel cells
Source: Royal Society of Chemistry journal article supplement (doi:10.1039/d2ta09110k), 2023-01-01
Supplement: d2ta09110k1.pdf [file d2ta09110k1.pdf]

## Supporting Information

### **Active and stable PtP<sub>2</sub>-based electrocatalyst solves the phosphate poisoning issue of high temperature fuel cells**

Jeong-Hoon Yu,<sup>a</sup> Kiran Pal Singh,<sup>a</sup> Se-Jun Kim,<sup>b</sup> Tong-Hyun Kang,<sup>a</sup> Kug-Seung Lee,<sup>c</sup>

Hyungjun Kim,<sup>b</sup> Stefan Ringe,<sup>\*,a,c</sup> and Jong-Sung Yu<sup>\*,a,d</sup>

<sup>a</sup> Department of Energy Science and Engineering, Daegu Gyeongbuk Institute of Science & Technology (DGIST), Daegu 42988, Republic of Korea

<sup>b</sup> Department of Chemistry, Korea Advanced Institute of Science and Technology (KAIST), Daejeon, 34141, Republic of Korea

<sup>c</sup> Pohang Accelerator Laboratory, Pohang 37673, Republic of Korea

<sup>d</sup> Energy Science and Engineering Research Center, DGIST, Daegu 42988, Republic of Korea

<sup>e</sup> Department of Chemistry, Korea University, Seoul 02841, Republic of Korea

\* Corresponding author

E-mail: sringe@korea.ac.kr (S. Ringe), jsyu@dgist.ac.kr (J.-S. Yu)

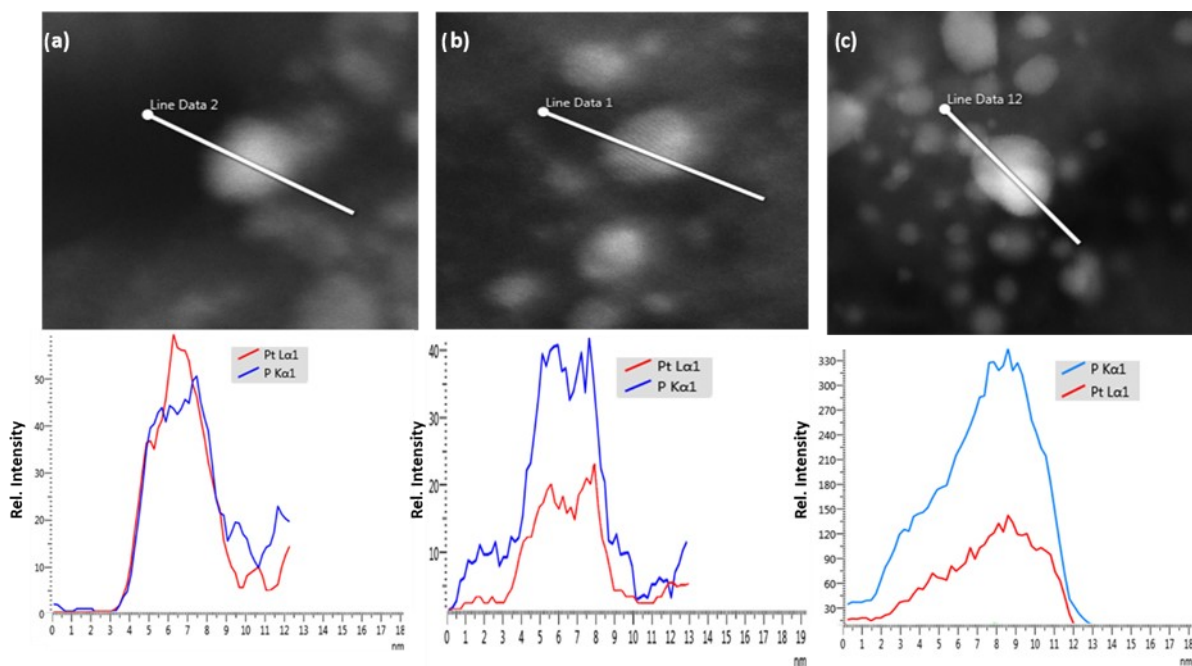

**Fig. S1** STEM-EDX line profiles across as-prepared PtP<sub>2</sub> nanoparticle: STEM reference images and compositional (Pt and P) profiles of (a) (1:2) PtP<sub>2</sub>/C-ASP, (b) (1:4) PtP<sub>2</sub>/C-ASP and (c) (1:6) PtP<sub>2</sub>/C-ASP.

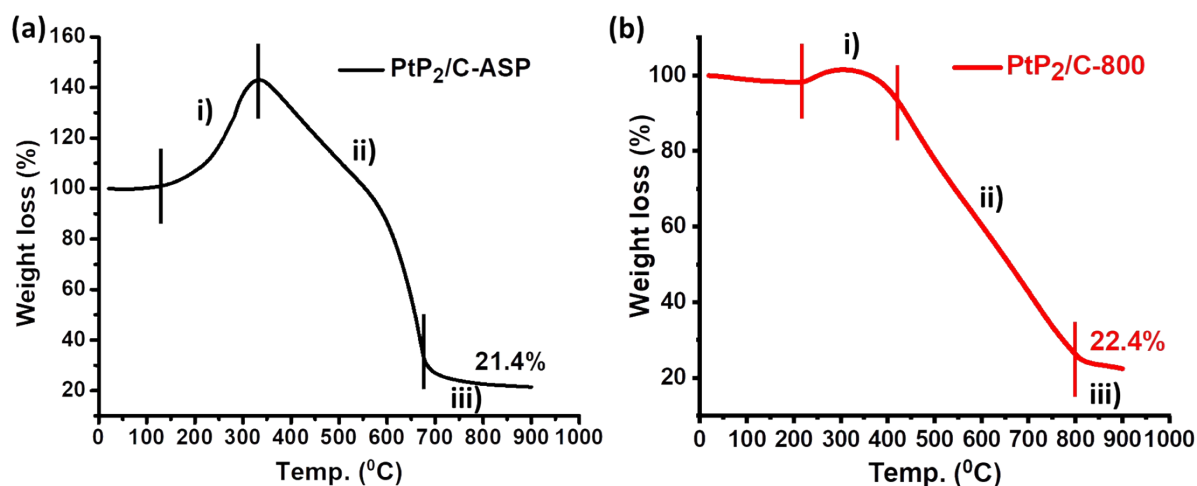

**Fig. S2** Thermo-gravimetric-analysis (TGA) of (a) PtP<sub>2</sub>/C-ASP and (b) PtP<sub>2</sub>/C-800 in O<sub>2</sub> atmosphere.

The observed TGA peaks can be divided into 3 regions: i) oxidation of TOP polymer (~120 to 450 °C) in the PtP<sub>2</sub>/C-ASP catalyst and conversion of lattice P into P<sub>2</sub>O<sub>5</sub> (~250 to 450 °C) in the PtP<sub>2</sub>/C-800 catalyst,<sup>1,2</sup> ii) oxidation of the ketjen-black-carbon support (450 to 680 °C), and iii) percentage of mass remained after the thermal treatment (<680 °C) in both catalysts. After the thermal oxidation in O<sub>2</sub> atmosphere, around 20% of the total mass remained for both samples in consideration of the stability of the PtP at high temperature. The remained mass can be attributed to the PtPO<sub>4</sub>. Therefore, it can be concluded that the prepared catalysts contain mostly PtP<sub>2</sub> catalyst.

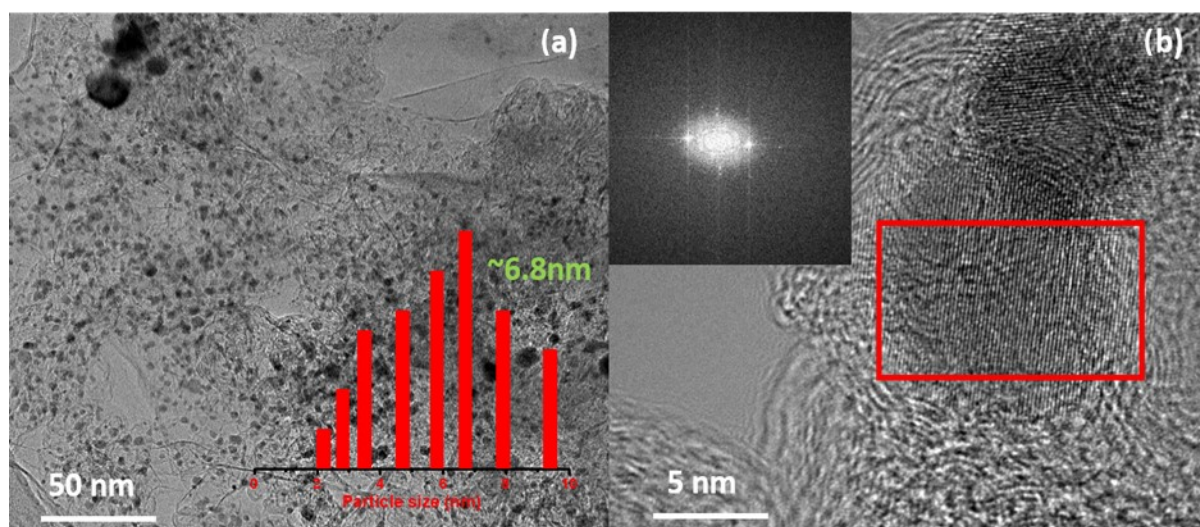

**Fig. S3** (a) The TEM image of PtP<sub>2</sub>/C-900 electrocatalyst along with inserted bar graph showing the PtP<sub>2</sub> particle size distribution and average PtP<sub>2</sub> particle size (~6.8 nm) and (b) HR-TEM image of PtP<sub>2</sub>/C-900 electrocatalyst and inset showing the FFT image of the red squared area.

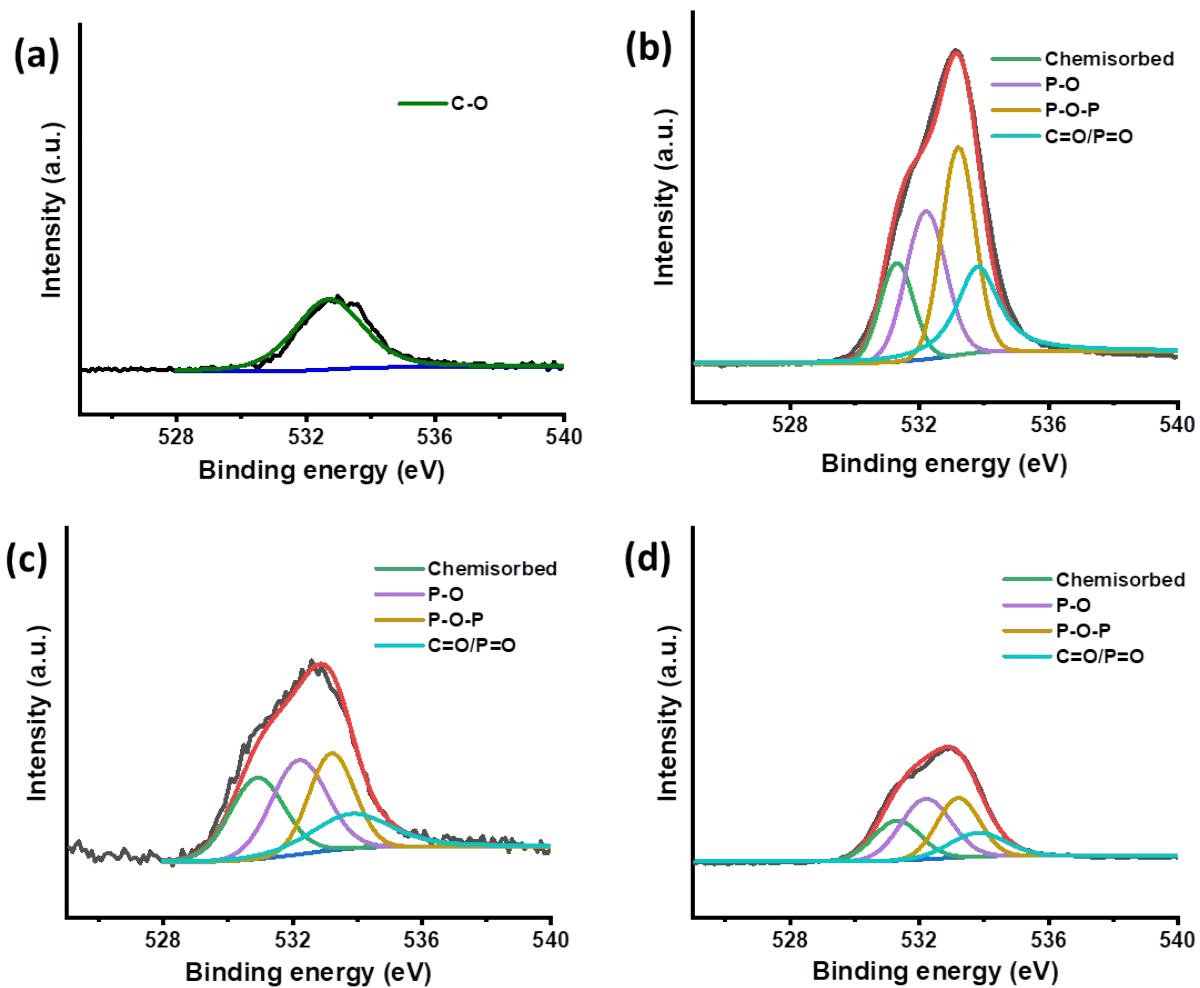

**Fig. S4** XPS profiles of O 1s for (a) Ketjen black, (b) PtP<sub>2</sub>/C-ASP, (c) PtP<sub>2</sub>/C-800 and (d) PtP<sub>2</sub>/C-900.

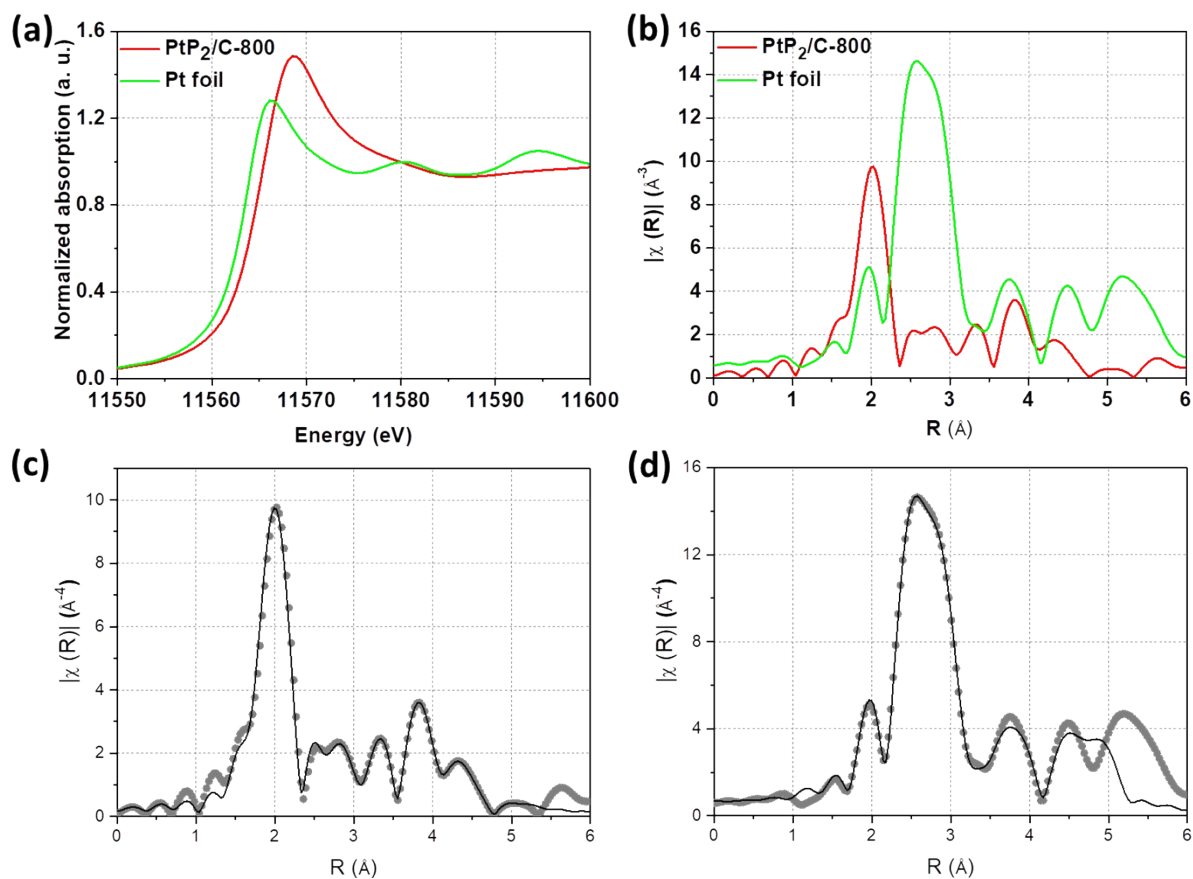

**Fig. S5** (a) XANES and (b) EXAFS profiles of PtP<sub>2</sub>/C-800 and Pt foil. Fourier-transforms of  $k^3$ -weighted EXAFS spectra (circle) and their best fits (solid line) for (c) PtP<sub>2</sub>/C-800 and (d) Pt foil.

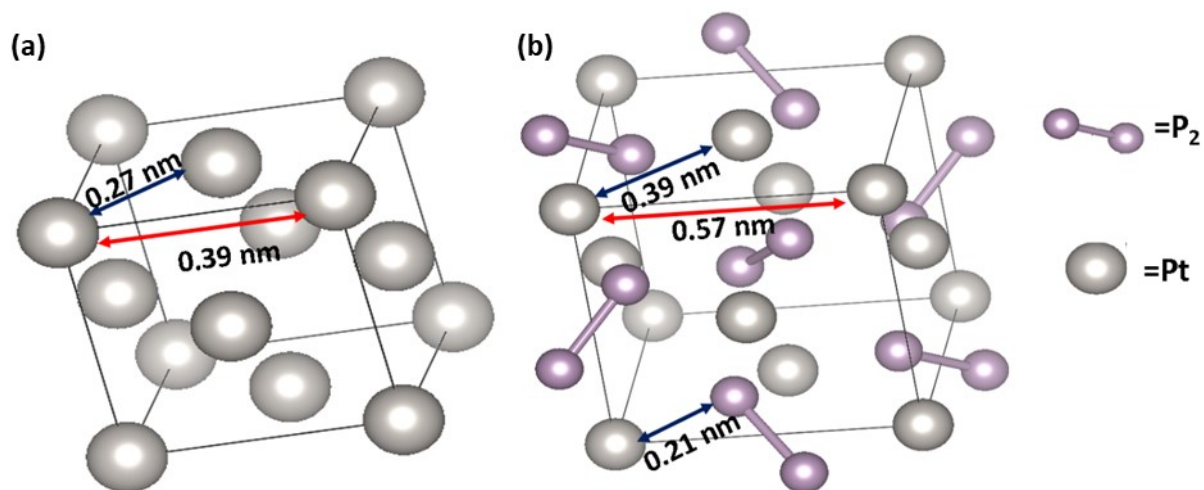

**Fig. S6** The unit cell structures of (a) Pt and (b) PtP<sub>2</sub>, demonstrating the orientation of Pt and P atom in the unit cell and the effective distance between each atom. The effective distance between each atom is calculated from the lattice parameters of the unit cells of Pt and PtP<sub>2</sub> as illustrated in Fig. 1d through the Rietveld refinement.

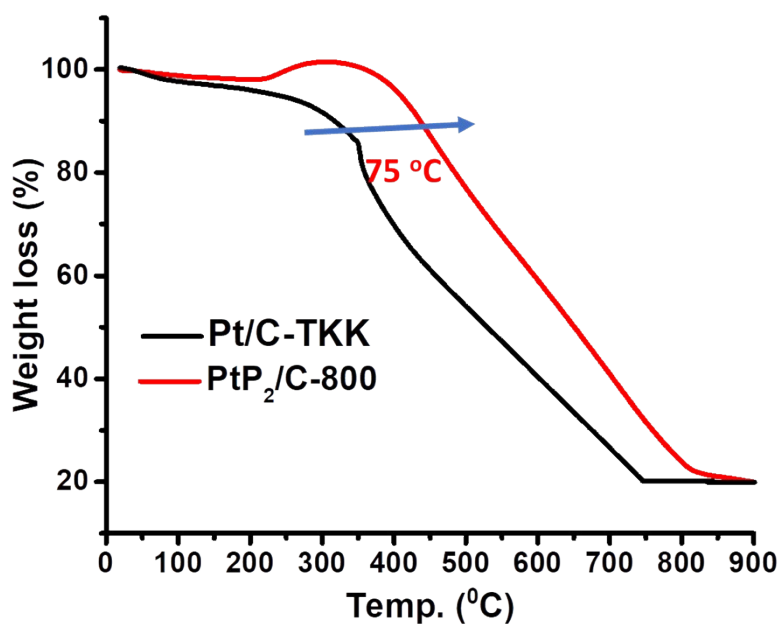

**Fig. S7** TGA analysis of PtP<sub>2</sub>/C-800 and commercial 20 wt.% Pt/C in O<sub>2</sub> atmosphere. Around 20% of mass remained after the completion of the TGA analysis.

The onset of carbon degradation is observed at ~350 °C for Pt/C catalyst and ~425 °C for PtP<sub>2</sub>/C-800 catalyst. A hump before carbon degradation in PtP<sub>2</sub>/C catalyst can be assigned to the oxidation of P. Due to the oxidation of P, the oxidation of carbon has been shifted to the right, indicating the presence of P improves the oxidative stability of carbon.



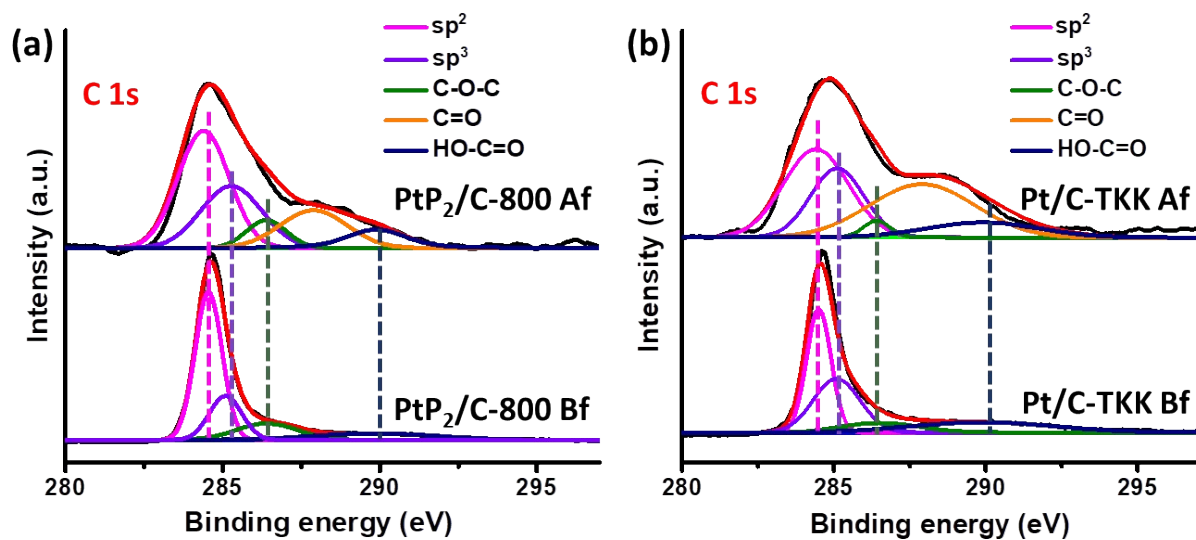

**Fig. S8** XPS deconvolution of C 1s spectra of (a) PtP<sub>2</sub>/C-800 cathode catalyst and (b) commercial 46.3 wt.% Pt/C-TKK catalyst before and after long-term test of 10K cycles which is carried out in an O<sub>2</sub>-saturated 0.1 M HClO<sub>4</sub> electrolyte as shown in Fig. 5.

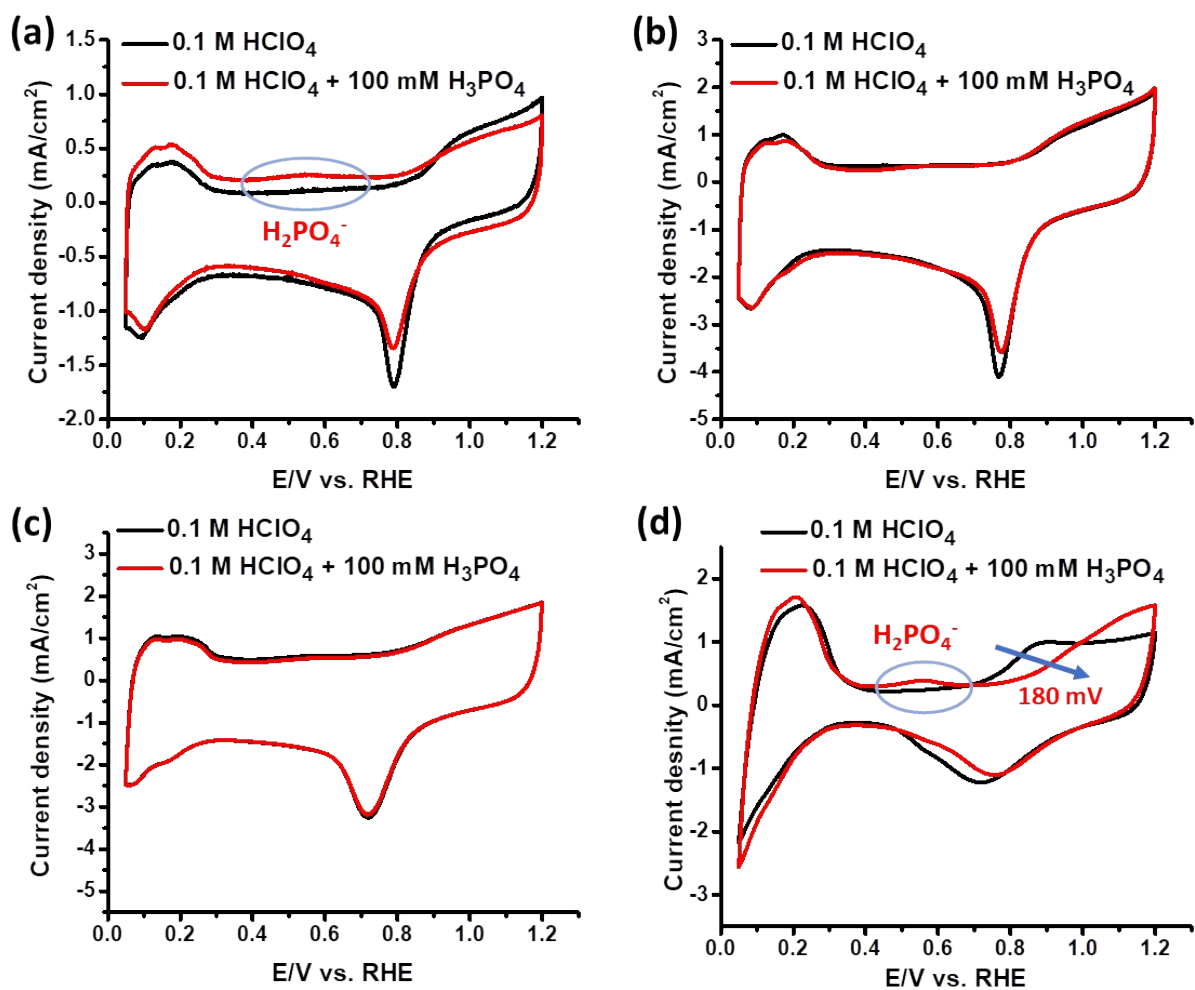

**Fig. S9** CV curves recorded for (a) PtP<sub>2</sub>/C-ASP, (b) PtP<sub>2</sub>/C-800, (c) PtP<sub>2</sub>/C-900, and (d) commercial 46.3 wt.% Pt/C-TKK in O<sub>2</sub>-saturated 0.1 M HClO<sub>4</sub> and 0.1 M HClO<sub>4</sub> + 0.1 M H<sub>3</sub>PO<sub>4</sub> electrolytes, respectively.

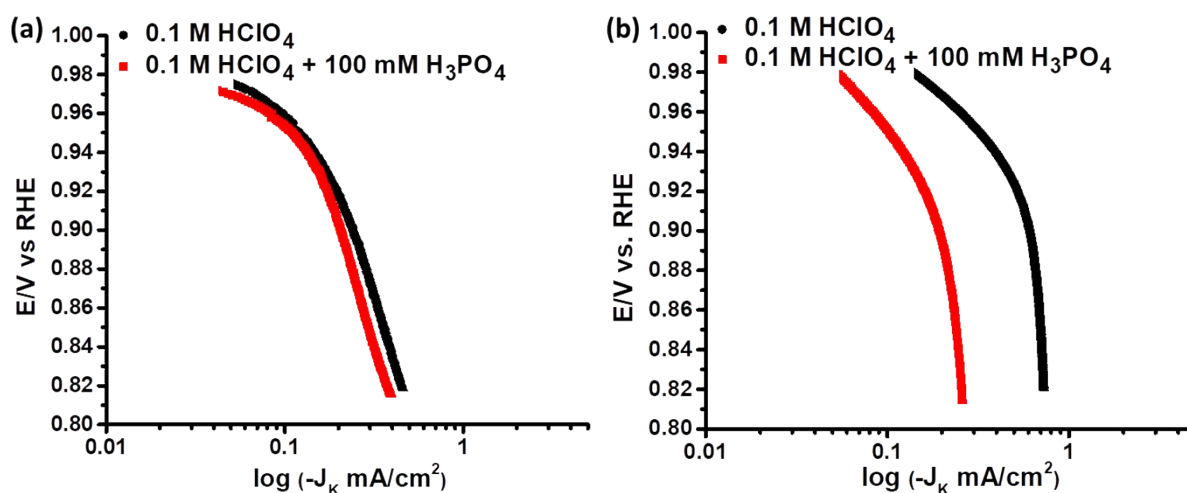

**Fig. S10** Mass transport-corrected Tafel plots obtained from LSV curves for (a) PtP<sub>2</sub>/C-800, and (b) Pt/C-TKK in O<sub>2</sub>-saturated 0.1 M HClO<sub>4</sub> (black line) and 0.1 M HClO<sub>4</sub> + 0.1 M H<sub>3</sub>PO<sub>4</sub> (red line) electrolytes, respectively.

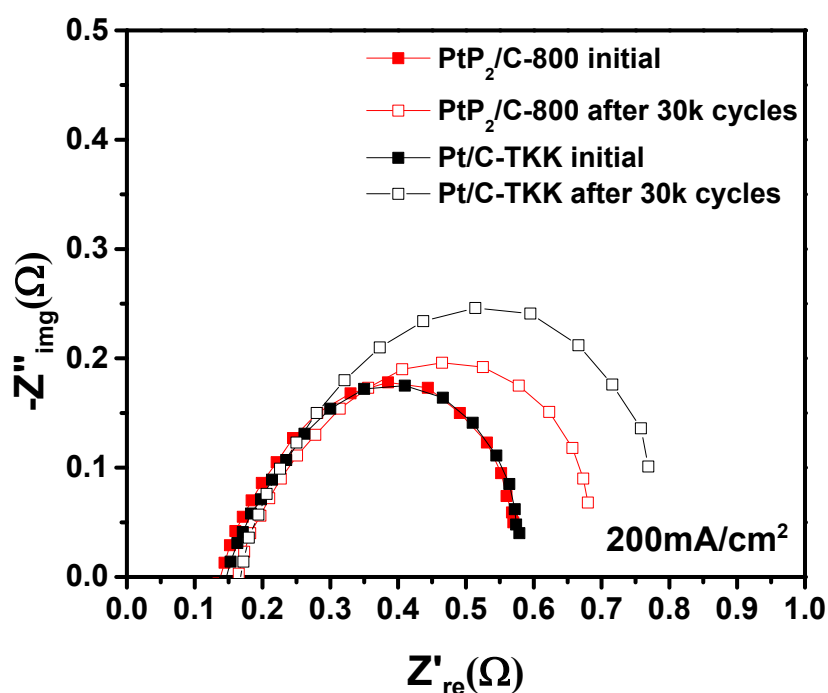

**Fig. S11** EIS results for PtP<sub>2</sub>/C-800 and Pt/C-TKK at a constant current density of 200 mA/cm<sup>2</sup> before and after the 30k ADT in HT-PEMFC as shown in Fig. 9. EIS were conducted at 1.5 bar O<sub>2</sub> backpressure and 180 °C cell temperature.

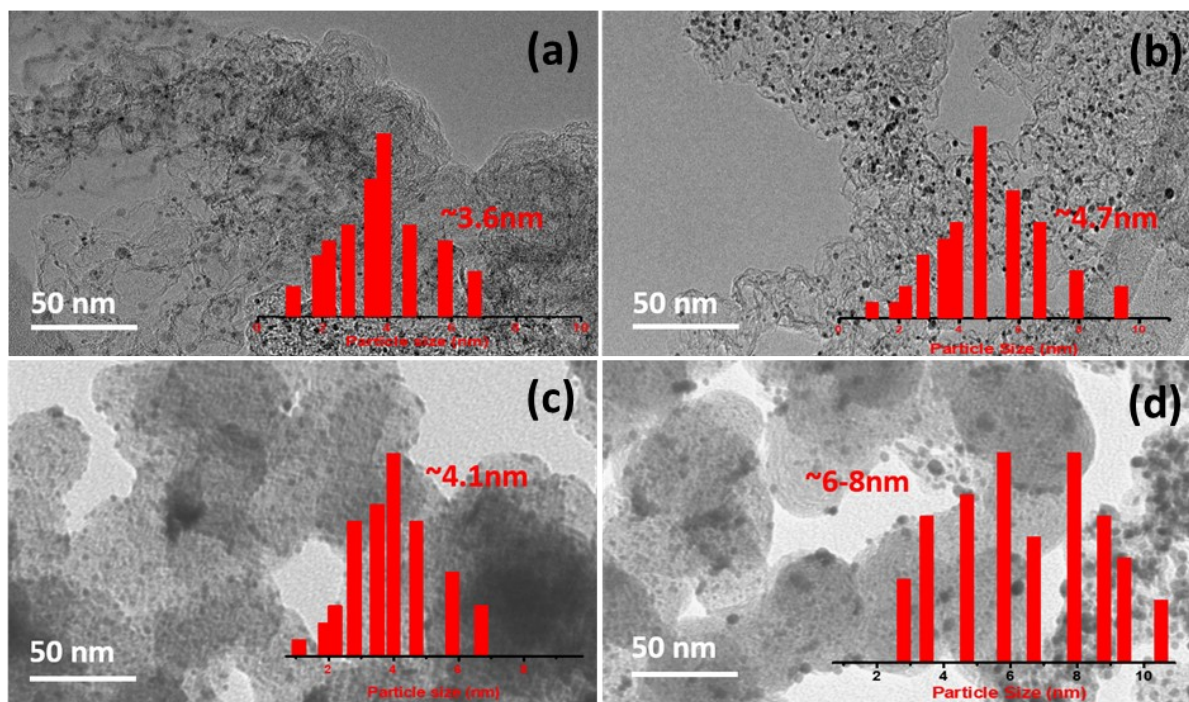

**Fig. S12** HR-TEM analysis of (a) and (b) PtP<sub>2</sub>/C-800 and (c) and (d) commercial 46.3 wt.% Pt/C-TKK before and after 30k ADT, respectively in HT-PEMFC as shown in Fig. 9. (Inset) shows the particle size distribution histogram for each catalyst before and after the durability test.

**Table S1** Physical and electrochemical properties of the prepared PtP<sub>2</sub>/C catalysts and commercial Pt/C-TKK catalyst.

| Sr. No. | Sample Name             | BET surface area (m <sup>2</sup> /g) | Pt composition (ICP) | Pt composition (XPS) | Mass-normalized electrochemical Surface area (m <sup>2</sup> g <sub>Pt</sub> <sup>-1</sup> ) | Particle Size nm (TEM) | Crystallite Size nm (XRD) |
|---------|-------------------------|--------------------------------------|----------------------|----------------------|----------------------------------------------------------------------------------------------|------------------------|---------------------------|
| 1       | Pt/C-TKK                | 368                                  | 46.3%                | 46%                  | 53                                                                                           | 4.1                    | 4.5                       |
| 2       | PtP <sub>2</sub> /C-ASP | 650                                  | 19.7 %               | 20.7%                | 47                                                                                           | 2.8                    | --                        |
| 3       | PtP <sub>2</sub> /C-800 | 575                                  | 20.4%                | 20.1%                | 52                                                                                           | 3.9                    | 3.8                       |
| 4       | PtP <sub>2</sub> /C-900 | 430                                  | 20.1%                | 19.4%                | 48                                                                                           | 6.8                    | 10.5                      |

**Table S2** Atomic percentage of C, P, and O determined by XPS survey scans of Ketjen black and PtP<sub>2</sub>-based catalysts.

| <b>Sample</b>           | <b>C 1s (at%)</b> | <b>P 2p (at%)</b> | <b>O 1s (at%)</b> |
|-------------------------|-------------------|-------------------|-------------------|
| Ketjen black            | 97.24             | 0.0               | 2.76              |
| PtP <sub>2</sub> /C-ASP | 73.94             | 5.74              | 20.32             |
| PtP <sub>2</sub> /C-800 | 83.87             | 4.43              | 11.7              |
| PtP <sub>2</sub> /C-900 | 92.85             | 3.82              | 3.33              |

**Table S3** Fourier transformed EXAFS fitting parameters for PtP<sub>2</sub>/C-800 and Pt foil. (N = coordination number, R = interatomic distance,  $\sigma^2$  = Debye-Waller factor (bond disorder), R-Factor = a measure of the quality of EXASFS fit)

| Sample                  | Path  | N          | R (Å)         | $\sigma^2$ (Å <sup>2</sup> ) | R-factor (%) |
|-------------------------|-------|------------|---------------|------------------------------|--------------|
| PtP <sub>2</sub> /C-800 | Pt-P  | 3.8 ± 0.7  | 2.374 ± 0.015 | 0.003 ± 0.001                | 0.8          |
|                         | Pt-P  | 3.3 ± 1.5  | 3.580 ± 0.029 | 0.005 ± 0.001                |              |
|                         | Pt-Pt | 12.9 ± 2.8 | 4.055 ± 0.036 | 0.007 ± 0.003                |              |
|                         | Pt-P  | 1.8 ± 1.3  | 4.728 ± 0.048 | 0.011 ± 0.003                |              |
|                         | Pt-Pt | 2.3 ± 1.2  | 2.751 ± 0.025 | 0.005 ± 0.001                |              |
|                         | Pt-Pt | 4.4 ± 1.2  | 3.821 ± 0.030 | 0.007 ± 0.003                |              |
|                         | Pt-Pt | 1.4 ± 0.5  | 4.957 ± 0.039 | 0.010 ± 0.004                |              |
| Pt foil                 | Pt-Pt | 11.0 ± 0.8 | 2.767 ± 0.003 | 0.004 ± 0.001                | 1.1          |
|                         | Pt-Pt | 4.6 ± 2.3  | 3.902 ± 0.013 | 0.005 ± 0.003                |              |
|                         | Pt-Pt | 17.5 ± 6.6 | 4.821 ± 0.011 | 0.007 ± 0.002                |              |

**Table S4** Theoretical ORR overpotentials. The table shows the adsorption energies (before zero-point energy and free energy corrections) in eV for the key reaction intermediates of ORR as obtained from an HSE06/DFT calculations and the estimated theoretical, thermodynamic overpotentials for ORR to H<sub>2</sub>O on (111) facets of Pt, Pt-terminated PtP<sub>2</sub> (<sup>t</sup>Pt-PtP<sub>2</sub>) and P-terminated PtP<sub>2</sub> and oxidized PtP<sub>2</sub>, in both cases at a P-defect site.

|                                                                   | $\Delta E_{\text{ads}} (*\text{OOH})$<br>(eV) | $\Delta E_{\text{ads}} (*\text{O})$<br>(eV) | $\Delta E_{\text{ads}} (*\text{OH})$<br>(eV) | $\eta$ (H <sub>2</sub> O)<br>(V) |
|-------------------------------------------------------------------|-----------------------------------------------|---------------------------------------------|----------------------------------------------|----------------------------------|
| <b>Pt</b>                                                         | <b>3.79</b>                                   | <b>1.26</b>                                 | <b>0.69</b>                                  | <b>0.79</b>                      |
| <b><sup>t</sup>Pt-PtP<sub>2</sub></b>                             | <b>3.49</b>                                   | <b>1.07</b>                                 | <b>0.37</b>                                  | <b>1.52</b>                      |
| <b><sup>t</sup>P,P<sub>def</sub>-PtP<sub>2</sub></b>              | <b>4.70</b>                                   | <b>2.64</b>                                 | <b>0.88</b>                                  | <b>0.60</b>                      |
| <b><sup>t</sup>P,P<sub>def</sub>-PtP<sub>2</sub>O<sub>5</sub></b> | <b>3.72</b>                                   | <b>1.67</b>                                 | <b>0.20</b>                                  | <b>1.28</b>                      |

## Notes and references

- (1) S. E. Habas, F. G. Baddour, D. A. Ruddy, C. P. Nash, J. Wang, M. Pan, J. E. Hensley and J. A. Schaidle, *Chem. Mater.*, 2015, **27**, 7580-7592.
- (2) A.R.J. Kucernak, K.F. Fahy and V. N. N. Sundaram, *Catalysis Today*, 2016, **262**, 48-56.
